# Supplementary material for: Plasma-treated carbon-fiber microelectrodes for improved purine detection with fast-scan cyclic voltammetry
Source: Royal Society of Chemistry journal article supplement (doi:10.1039/c9an01636h), 2019-12-02
Supplement: c9an01636h1.pdf [file c9an01636h1.pdf]

Electronic Supplementary Information

Plasma-treated carbon-fiber microelectrodes for improved purine detection with fast-scan cyclic voltammetry

Yuxin Li <sup>1</sup> and Ashley E. Ross<sup>1,2</sup>

<sup>1</sup>University of Cincinnati  
Department of Chemistry  
312 College Dr.  
404 Crosley Tower  
Cincinnati, OH 45221-0172

Office #: 513-556-9314  
Email: [Ashley.ross@uc.edu](mailto:Ashley.ross@uc.edu)

<sup>2</sup>Corresponding author

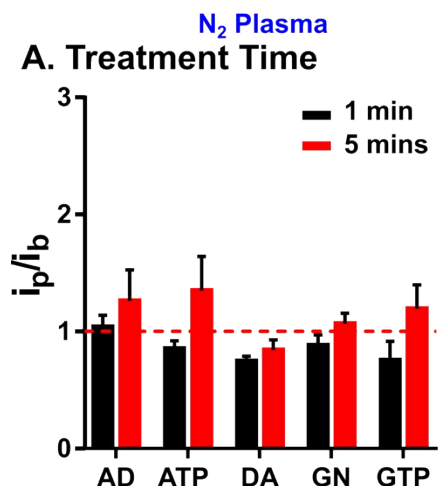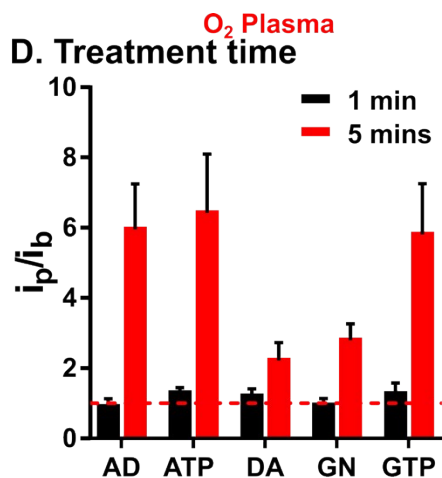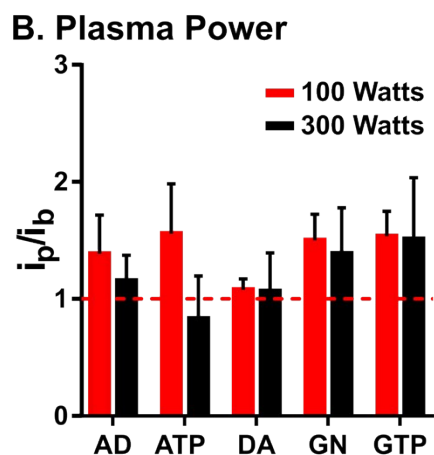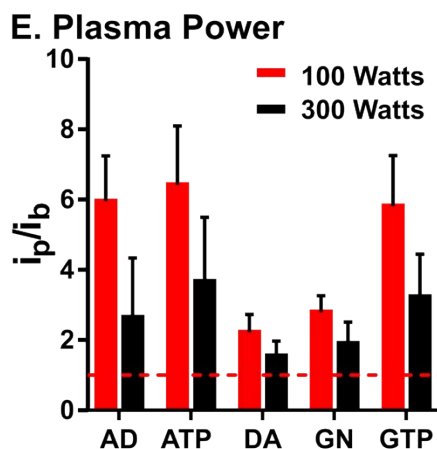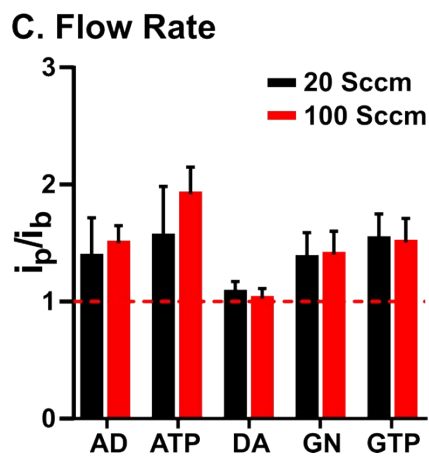

**Figure S-1:** Plasma parameters were optimized for N<sub>2</sub> (A-C) and O<sub>2</sub> (D-E) plasma. (A) At constant flow rate and power (20 sccm, 50 Watts), treatment time was tested for N<sub>2</sub> plasma. The optimal treatment time was chosen as 5 min. (B) At the optimal treatment time (5 min) and a constant flow rate (20 sccm), two additional powers were tested (100 W and 300 W). 300 W power was too high (visibly damaged some electrodes) and the electrodes were hot to touch after treatment therefore, 100 W was chosen as optimal. (C) At the optimized power (100 W) and treatment time (5 min), the flow rate was tested (20 and 100 sccm) for N<sub>2</sub> plasma. Flow rate didn't significantly impact the plasma treatment. A 100 sccm flow rate was used for all proceeding N<sub>2</sub> and O<sub>2</sub> plasma treatments. (D) At 100 W and 100 sccm, the treatment time was varied (1 and 5 min). Just like N<sub>2</sub> plasma, 5 min was optimal. (E) Likewise, the optimal time (5 min) and flow rate (100 sccm) were held constant and power was varied from 100 to 300 W. Just like N<sub>2</sub> plasma, 300 W was too high. (n = 4-12)

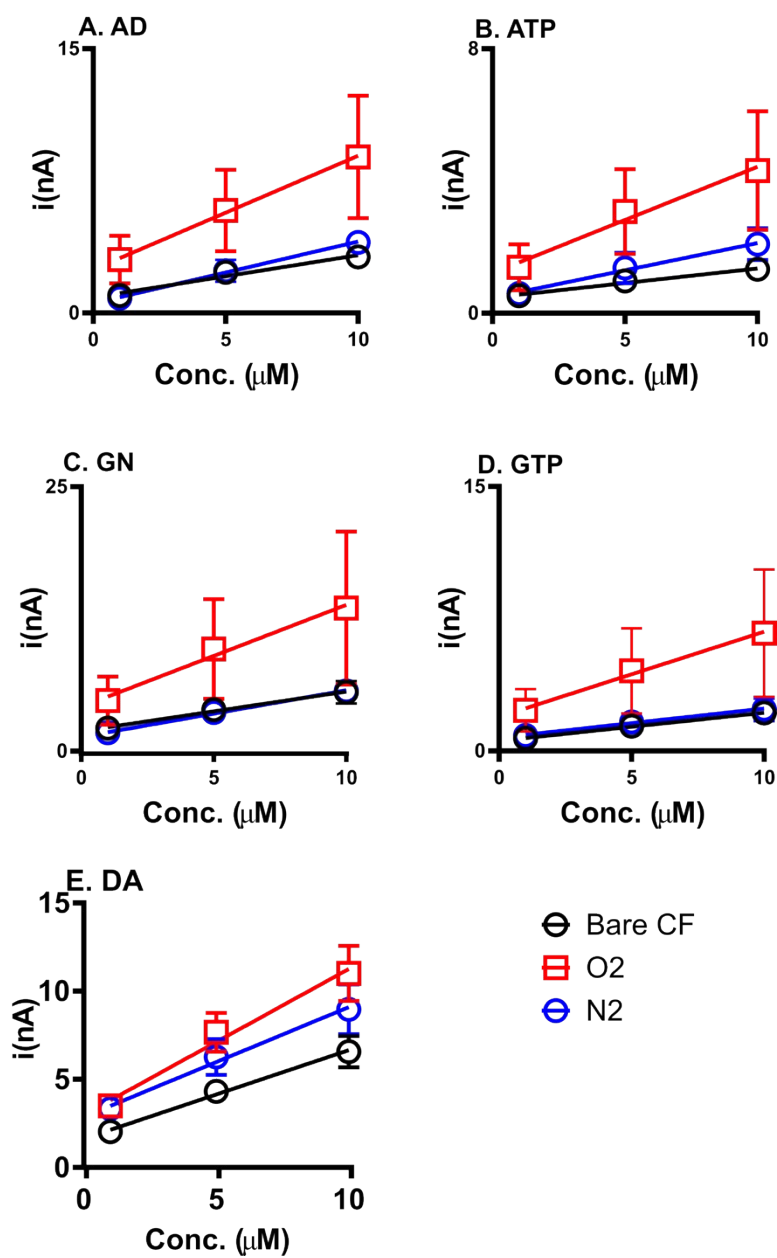

**Figure S-2:** Both  $\text{O}_2$  and  $\text{N}_2$  plasma treatment changes the sensitivity of the electrode for purines and dopamine. Sensitivity for (A) AD, (B) ATP, (C) GN, (D) GTP, and (E) DA at the bare carbon fiber (CF, black),  $\text{O}_2$  plasma (red), and  $\text{N}_2$  plasma (blue) treated electrodes. Concentrations tested ranged from 1  $\mu\text{M}$  to 10  $\mu\text{M}$ . ( $n = 4-5$ )

**Table S-1. Plasma affects the surface coverage, adsorption strength, and sensitivity (n =**

| Analyte | Surface Coverage ( $\Gamma$ , pmol/cm <sup>2</sup> ) |                |                | Adsorption Strength (b, cm) |                |                | Sensitivity (nA/ $\mu$ M) |                |                |
|---------|------------------------------------------------------|----------------|----------------|-----------------------------|----------------|----------------|---------------------------|----------------|----------------|
|         | Bare                                                 | O <sub>2</sub> | N <sub>2</sub> | Bare                        | O <sub>2</sub> | N <sub>2</sub> | Bare                      | O <sub>2</sub> | N <sub>2</sub> |
| AD      | 12.9 ± 2.5                                           | 20.1 ± 4.6     | 19.2 ± 5.2     | 0.09 ± 0.001                | 0.24 ± 0.01    | 0.13 ± 0.004   | 0.24                      | 0.64           | 0.35           |
| ATP     | 14.4 ± 7.8                                           | 22.2 ± 8.1     | 19.5 ± 12.3    | 0.04 ± 0.001                | 0.15 ± 0.005   | 0.05 ± 0.001   | 0.09                      | 0.32           | 0.16           |
| GN      | 38.1 ± 8.1                                           | 62.9 ± 23      | 60 ± 20        | 0.17 ± 0.003                | 0.54 ± 0.10    | 0.22 ± 0.002   | 0.37                      | 0.96           | 0.44           |
| GTP     | 16.3 ± 3.6                                           | 26.9 ± 6.9     | 22.7 ± 6       | 0.09 ± 0.002                | 0.27 ± 0.01    | 0.09 ± 0.002   | 0.16                      | 0.48           | 0.17           |
| DA      | 138 ± 22                                             | 227 ± 34.2     | 179 ± 37       | 0.84 ± 0.002                | 1.27 ± 0.003   | 1.04 ± 0.004   | 0.50                      | 0.83           | 0.62           |

**4-5)**

| Analyte | Equilibrium Constant $\beta$ ( $\times 10^{-2} \text{cm}^3/\text{pmol}$ ) |                       |                       |
|---------|---------------------------------------------------------------------------|-----------------------|-----------------------|
|         | Bare CF                                                                   | O <sub>2</sub> Plasma | N <sub>2</sub> Plasma |
| AD      | 0.42                                                                      | 1.80                  | 0.68                  |
| ATP     | 0.18                                                                      | 0.61                  | 0.35                  |
| GN      | 0.67                                                                      | 1.16                  | 0.38                  |
| GTP     | 0.52                                                                      | 1.78                  | 0.44                  |
| DA      | 0.63                                                                      | 0.83                  | 0.90                  |

**Table  
Plasma  
the**

**S-2.  
affects**

**equilibrium constant ( $\beta$ , n = 4-5)**
